# Supplementary material for: Mussel-inspired sticky self-healing conductive hydrogels composites for physiological electrical sensing
Source: Royal Society of Chemistry journal article supplement (doi:10.1039/d4ta04012k), 2024-01-01
Supplement: d4ta04012k1.pdf [file d4ta04012k1.pdf]

## Supporting Information

### **Mussel-inspired Sticky Self-healing Conductive Hydrogels Composites for Physiological Electrical Sensing**

Ming-Lin He<sup>1</sup>, Nai-Feng Chen<sup>2</sup>, Pei Xiang Wang<sup>1</sup>, Hsin-Ya Chen<sup>1</sup>, Wan-Yi Lai<sup>1</sup>, Pei-Tun Liao<sup>1</sup>, Jiasheng Yu<sup>3</sup>, Yang Wei<sup>1</sup>, Ren-Jei Chung<sup>1</sup>, Chun-Hsien Hsu,<sup>4</sup> Shiu-Jau Chen<sup>5\*</sup>, Ting-Ting Chang<sup>2\*</sup>, Wen-Ya Lee<sup>1,2\*</sup>

Table S1. The summary of adhesion strength, self-healing efficiency, and conductivity of mussel-inspired hydrogels

| System                      | Adhesion strength (kPa) | Healing efficiency | Conductivity (mS/cm)           | Reference |
|-----------------------------|-------------------------|--------------------|--------------------------------|-----------|
| PAM/HAC/Borax               | 49.6                    | 40%                | 0.18<br>110 (Li <sup>+</sup> ) | [S1]      |
| TA@CNC/PVA/Borax            | 60                      | 92%                | N/A                            | [S2]      |
| PVA-PAA/PEI                 | 11                      | 87%                | N/A                            | [S3]      |
| PVA-SbQ/CNC                 | 25                      | N/A                | N/A                            | [S4]      |
| PDA/CNT/PAA/PAM             | 60                      | N/A                | 82                             | [S5]      |
| PAA/DA/PPy/Fe <sup>3+</sup> | ~50                     | N/A                | 3.9                            | [S6]      |
| L-DMA-PCL                   | 38.4                    | N/A                | 55                             | [S7]      |
| PVA/PDAP/Borax              | 121                     | 91.2%              | 38                             | This work |

[S1] *Macromol. Rapid Commun.* 2020, 41,1900450.

[S2] *ACS Appl. Mater. Interfaces*, 2019, 11.6: 5885-5895.

[S3] *Polymer*, 2020, 206: 122845.

[S4] *Macromol. Mater.Eng.*, 2020, 305.1: 1900623.

[S5] *Adv. Funct. Mater.* 2018, 28, 1704195

[S6] *J. Mater. Chem. B*, 2021,9, 2221-2232

[S7] *J. Colloid Interface Sci.*, 2021, 585, 420

(a)

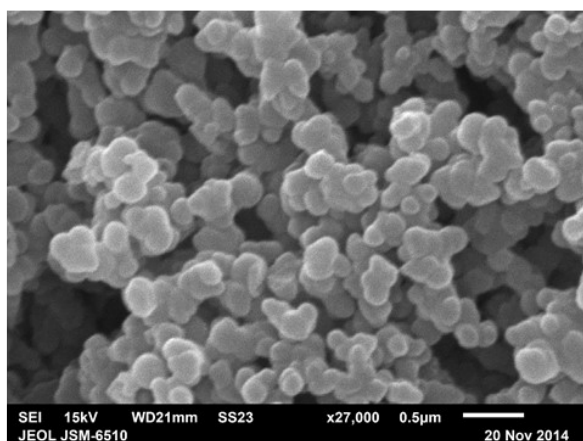

(b)

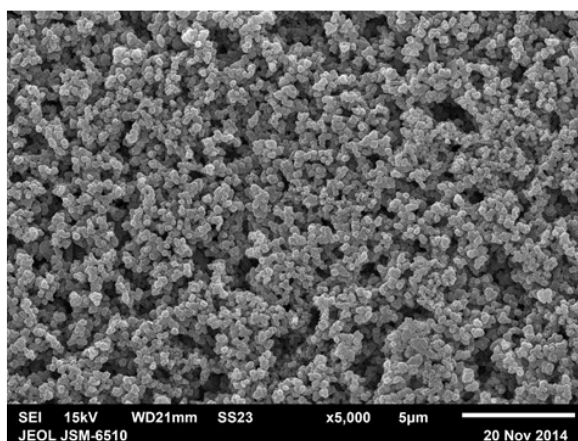

Figure S1. SEM images of (a,b) PDAP at different magnifications.

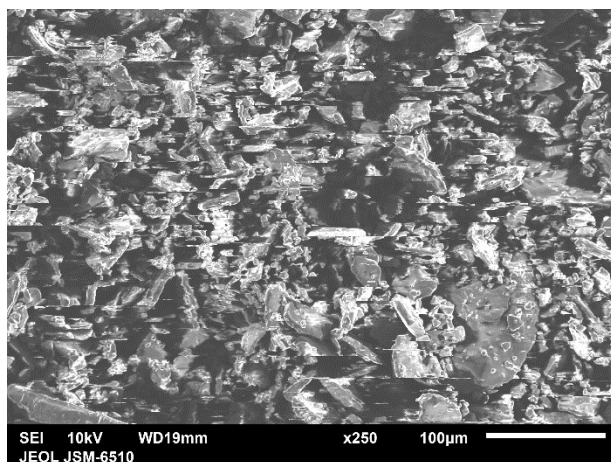

Figure S2. SEM image of the unpolymerized dopamine hydrochloride.

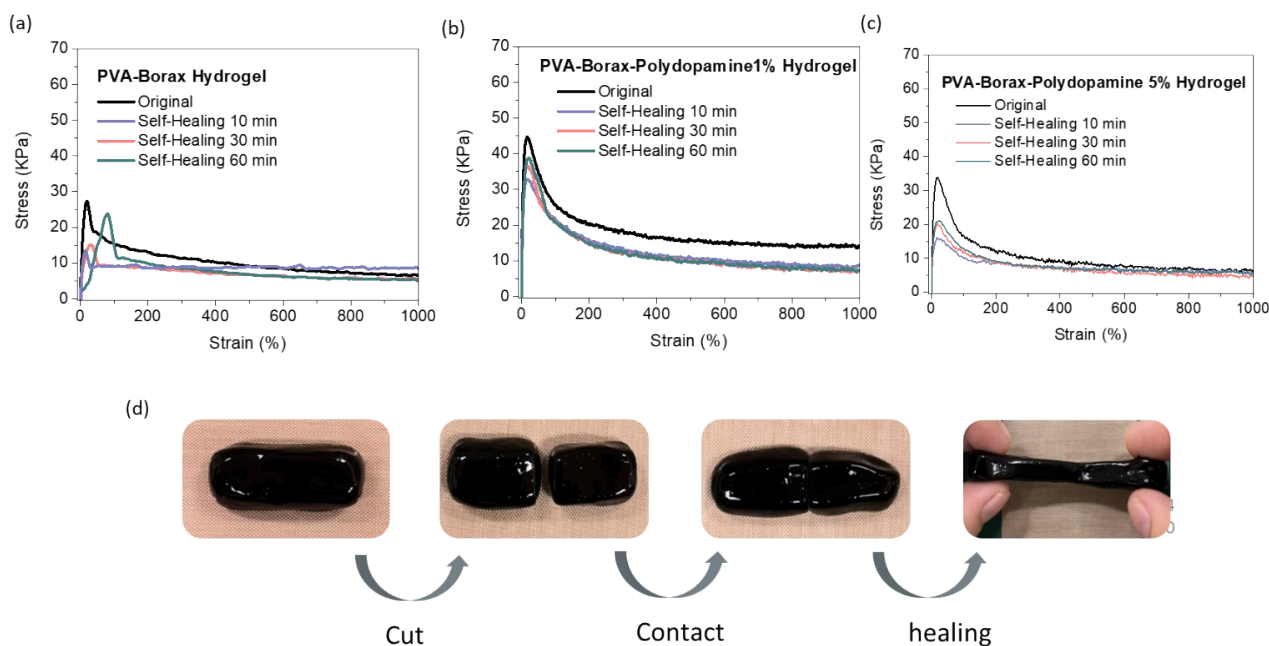

Figure S3. (a-c) Stress-strain curves of the hydrogel adhesives with various amount of PDAPs. (d). Demonstration of self-healing properties in a PVA/Borax/PDAP hydrogel.

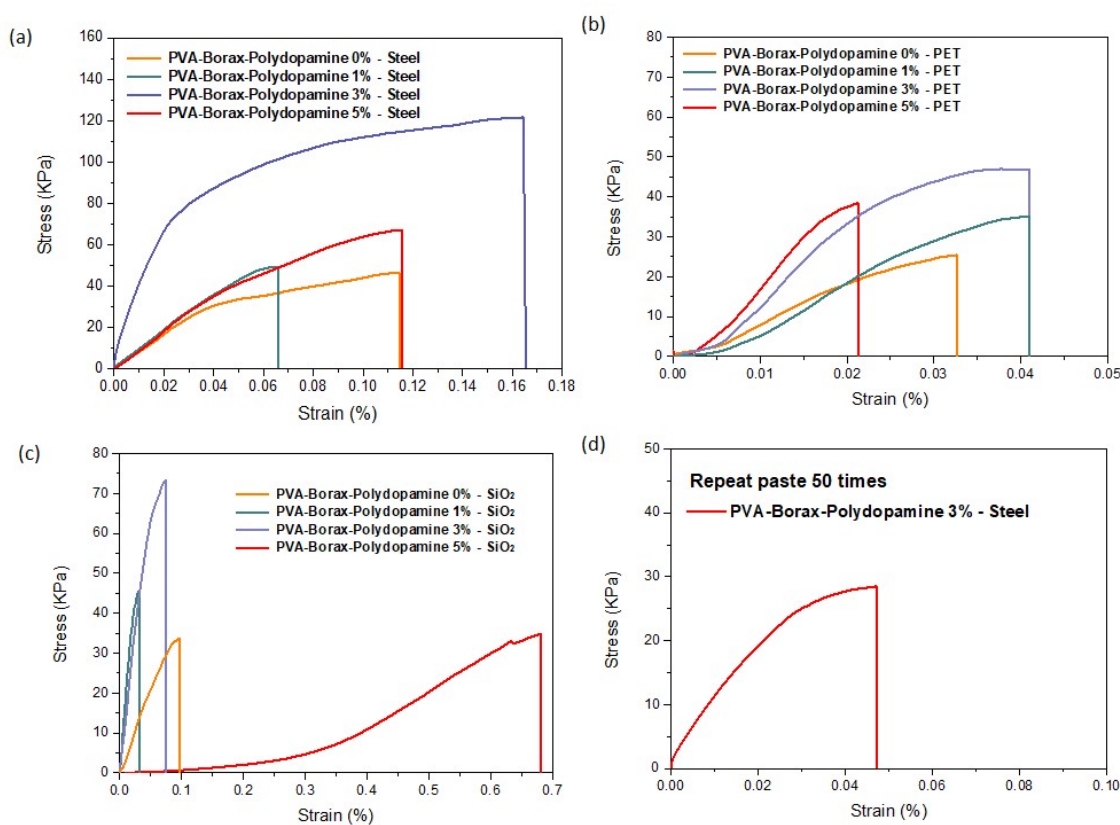

Figure S4. Tensile stress-strain curves for (a-c) the adhesion strength of the hydrogel with different concentrations of PDAPs to different substrates and (d) 3wt % hydrogel after 50 times repeatedly paste/peel cycles.

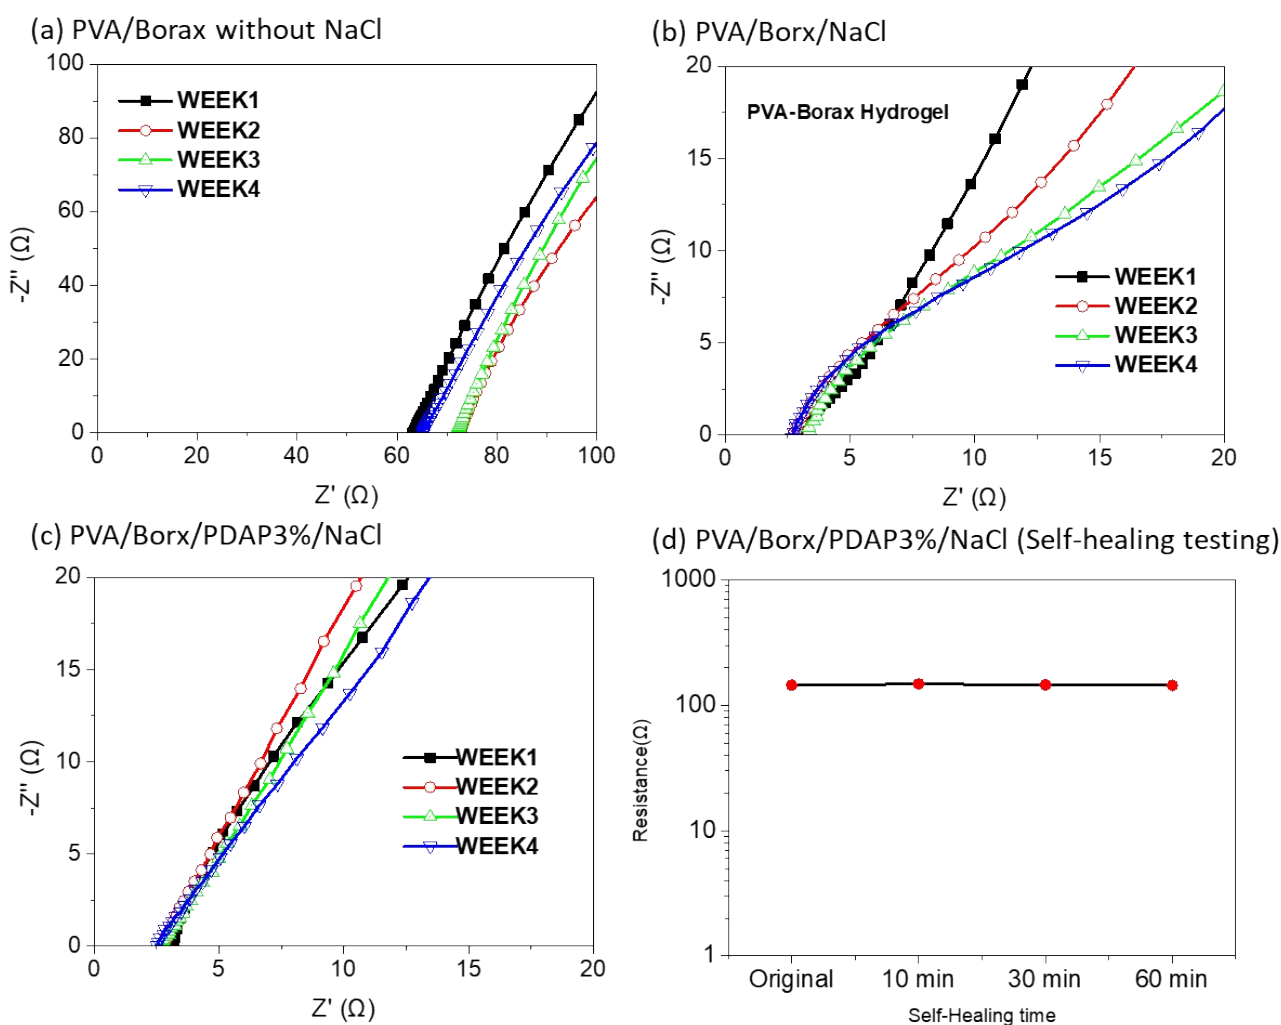

Figure S5. (a-c) Nyquist plots of the conductive hydrogel adhesive along with time; (d) Resistance recovery of the conductive hydrogel adhesives after cutting.

sketch\_mar24a

```
void setup() {  
  // initialize the serial communication:  
  Serial.begin(9600);  
  pinMode(10, INPUT); // Setup for leads off detection LO +  
  pinMode(11, INPUT); // Setup for leads off detection LO -  
  
}  
  
void loop() {  
  
  if((digitalRead(10) == 1) || (digitalRead(11) == 1)){  
    //Serial.println('!');  
  }  
  else{  
    // send the value of analog input 0:  
    Serial.println(analogRead(A0));  
  }  
  //wait for a bit to keep serial data from saturating  
  delay(1);  
}
```

Figure S6. Codes of the Arduino UNO microcontroller with AD8232 module.
